# Supplementary material for: Preparation, Physicochemical Properties, Invitro And In Vivo Release Evaluation of Chitosan Decorated Curcumin Loaded Niosome
Source: Research Square preprint supplement (doi:10.21203/rs.3.rs-429869/v1), 2021-05-06
Supplement: Supplementary file 1 [file 4ff6b05d1373fb9312b088e6.xlsx]

## Sheet: Sheet1
NHM1000	110.9	111.5	111	111.133	0.321455
NHM1100	127.9	128.5	128	128.133	0.321455
NHM1200	70.7	70	69.9	70.2	0.43589
NHM1300	96.9	97	97.5	97.1333	0.321455
NHM1400	153	153.7	152.9	153.2	0.43589
NHM1500	117.3	117.2	116.5	117	0.43589
NHM1600	125.5	124.7	125.5	125.233	0.46188
NHM1000	0.185	0.188	0.19	0.187667	0.00251661
NHM1100	0.251	0.253	0.25	0.251333	0.00152753
NHM1200	0.21	0.22	0.2	0.21	0.01
NHM1300	0.182	0.18	0.184	0.182	0.002
NHM1400	0.37	0.38	0.36	0.37	0.01
NHM1500	0.28	0.29	0.33	0.3	0.0264575
NHM1600	0.13	0.15	0.14	0.14	0.01
NHM1000	-31.4	-29.9	-30.2	-30.5	0.793725
NHM1100	-26.3	-25.9	-26	-26.0667	0.208167
NHM1200	-23.2	-23	-22.9	-23.0333	0.152753
NHM1300	-26.1	-25.9	-26.1	-26.0333	0.11547
NHM1400	-27.2	-27.2	-26.7	-27.0333	0.288675
NHM1500	-36	-35.8	-36.2	-36	0.2
NHM1600	-30.6	-30.5	-29.5	-30.2	0.608276
NHM1000	74.9	75.5	74.6	75	0.458258
NHM1100	33	33.1	32.9	33	0.1
NHM1200	88.8	88	88.2	88.3333	0.416333
NHM1300	60.1	59.9	60.3	60.1	0.2
NHM1400	90.5	89.6	89.9	90	0.458258
NHM1500	64.4	64.6	64	64.3333	0.305505
NHM1600	32.2	32	32.2	32.1333	0.11547
